# Supplementary material
Source: PubMed Central journal article supplement (PMC6917681)
Supplement: 13337_2019_553_MOESM1_ESM.pdf [file 13337_2019_553_MOESM1_ESM.pdf]

## Study Sites

### Northern Cities

- New Delhi (ND)
- Amritsar, Punjab (PB)
- Ghaziabad, Uttar Pradesh (UP)
- Jaipur, Rajasthan (RJ)
- Faridabad, Haryana (HY)

### Northeastern Cities

- Guwahati, Assam (AS)
- Imphal, Manipur (MP)
- Aizawl, Mizoram (MZ)

### Eastern Cities

- Kolkatta, West Bangal (WB)

### Southern Cities

- Chennai, Tamil Nadu (TN)

### Western Cities

- Mumbai, Maharashtra (MH)

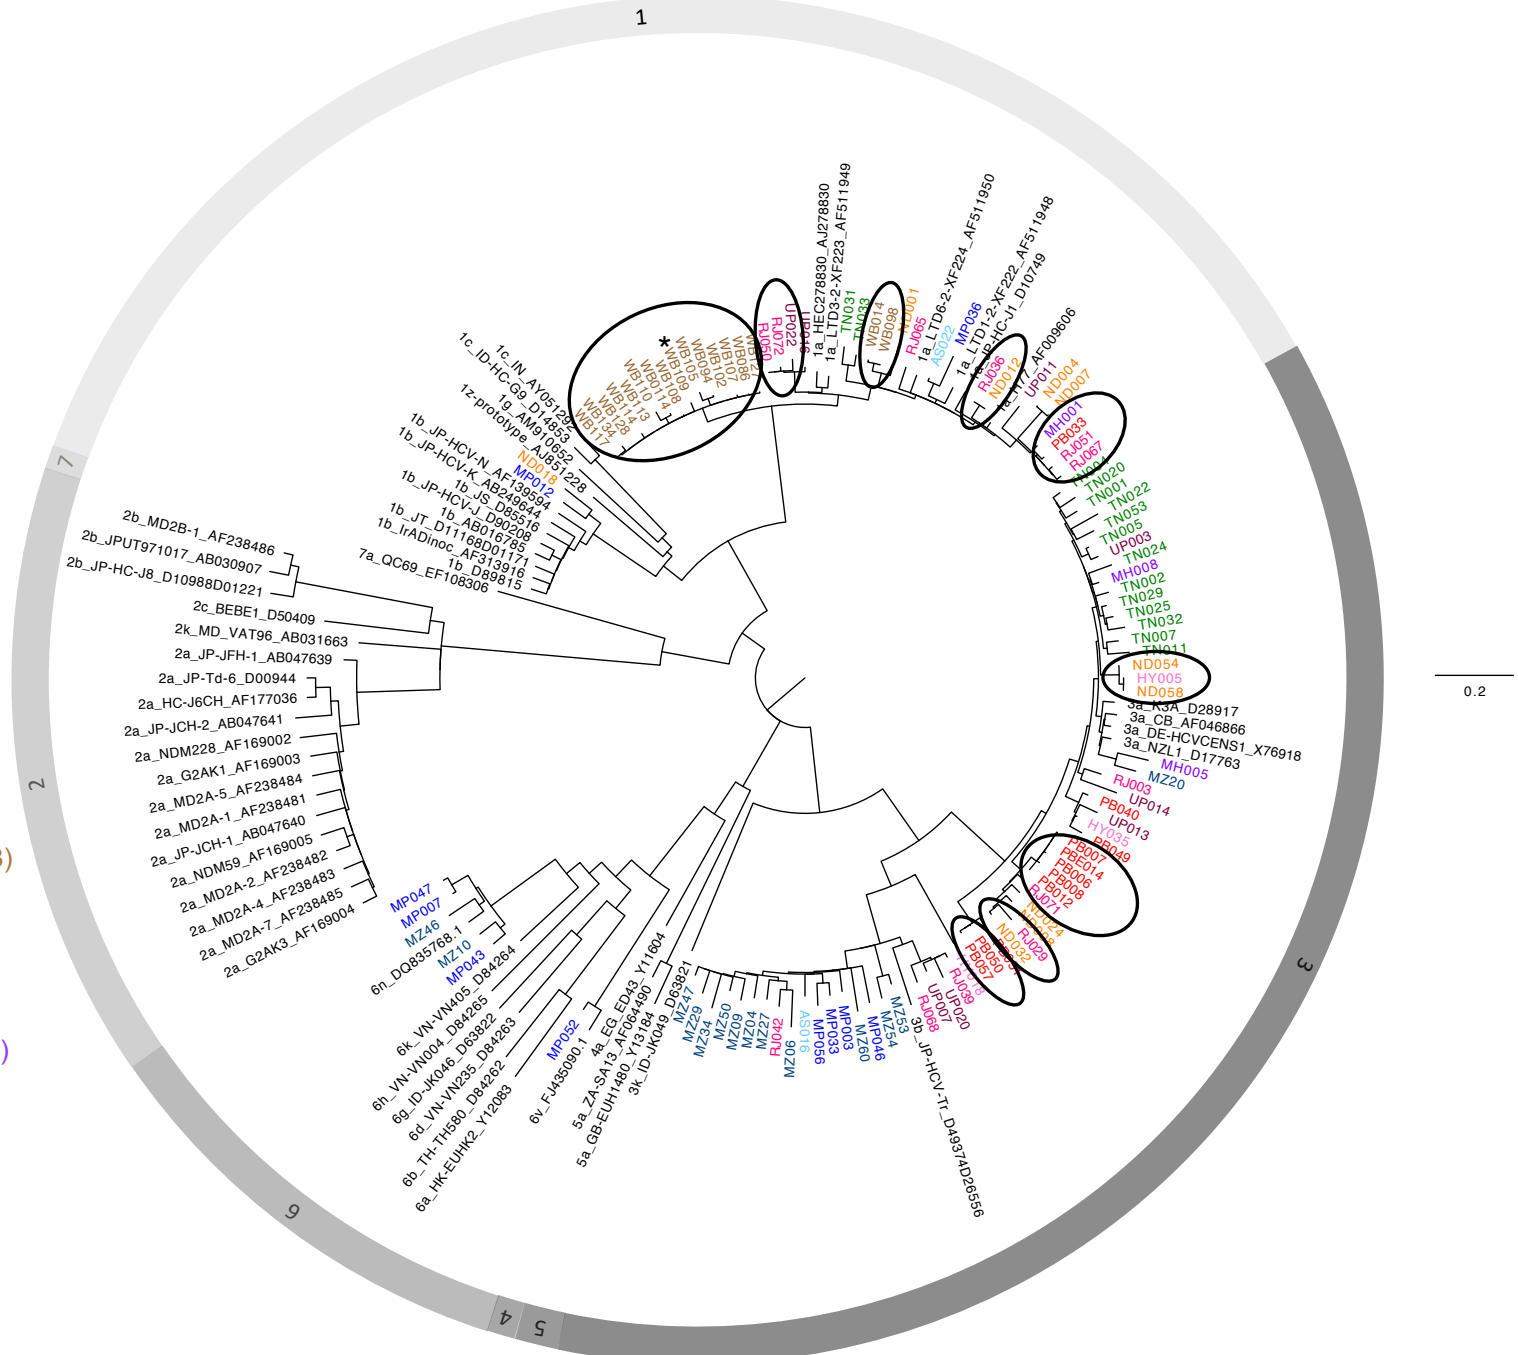

**Online Resource 2.** Phylogenetic tree of HCV sequences from 105 participants in 8 study sites with clusters designation. Phylogenetic tree was inferred by maximum-likelihood reconstruction with 1000 bootstrap replicates based on the nucleotide alignment of the core/E1 sequences as implemented in the MEGA version 6 package. Clusters were determined using a genetic distance threshold of 4% using MicrobeTRACE v1.9

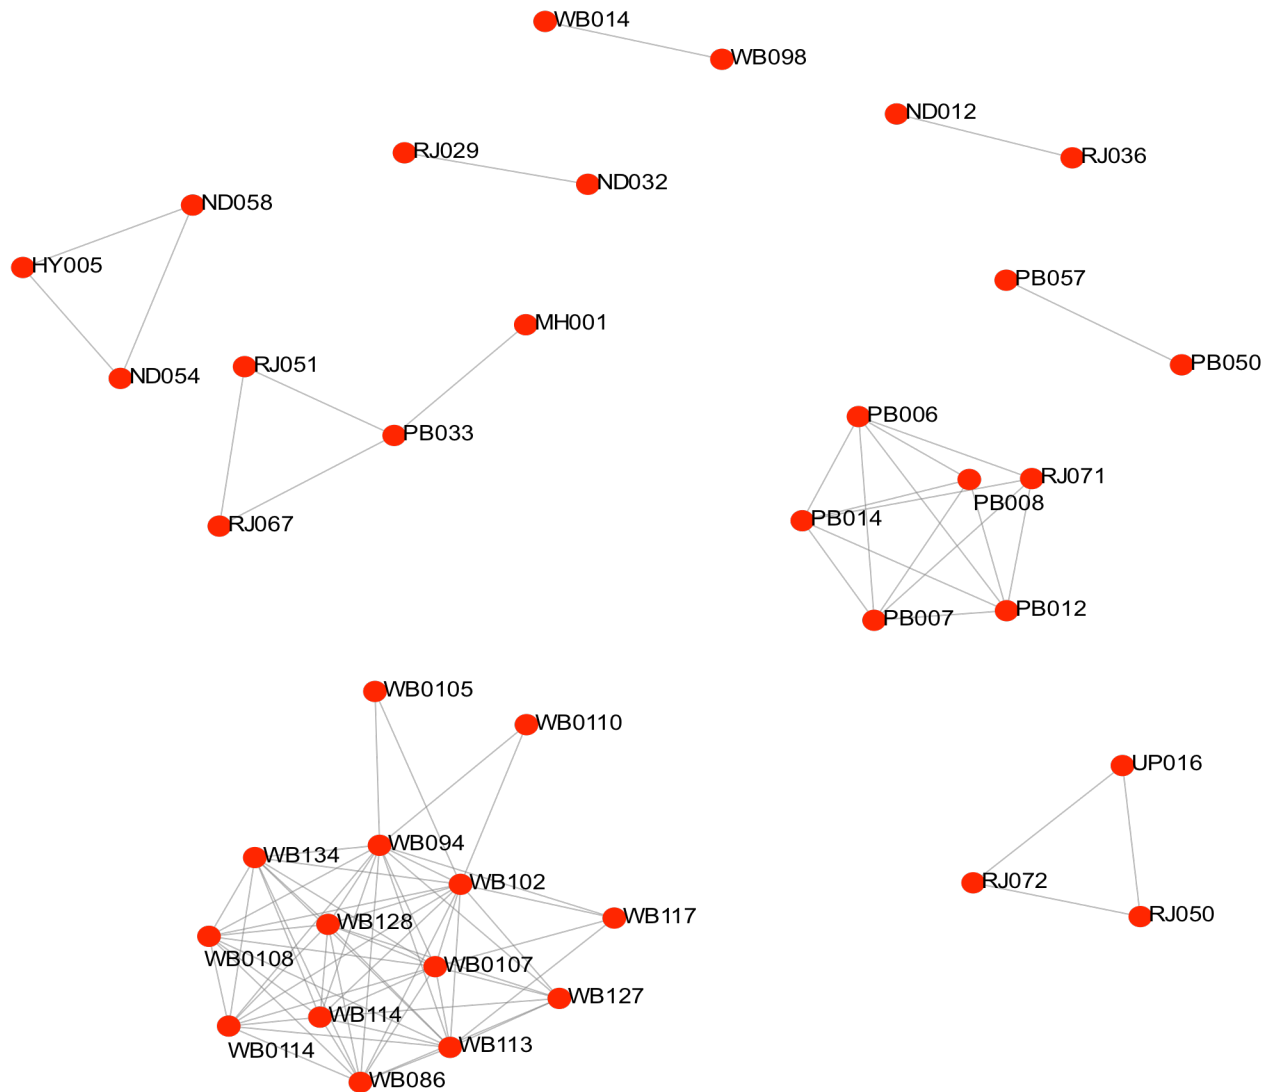

**Online Resource 3.** Genetic clusters identified using a genetic distance threshold of 4% (MicrobeTRACE version 1.9)
